# Supplementary material for: Biodegradation of crystal violet by newly isolated bacteria
Source: PeerJ. 2024 May 27;12:e17442. doi: 10.7717/peerj.17442 (PMC11138513; doi:10.7717/peerj.17442)
Supplement: Supplemental Information 1 — Absorbance measurements and calculated degradation rates, each repeated three times. [file peerj-12-17442-s001.xlsx]

## Sheet: Sheet1
	initial dye	dye solely
		con	hcd1	cvbr	cvo	cvwi	scd1	scd3	kw
OD	1.018	0.99	0.32	0.533333	0.706667	0.693333	0.68	0.726667	0.713333
		1.01	0.253333	0.466667	0.786667	0.613333	0.786667	0.753333	0.64
		1.05	0.413333	0.506667	0.68	0.766667	0.653333	0.686667	0.733333
rate		2.75049	68.5658	47.6097	30.5828	31.8926	33.2024	28.6182	29.928
		0.785855	75.1146	54.1585	22.7243	39.7511	22.7243	25.9987	37.1316
		-3.14342	59.3975	50.2292	33.2024	24.6889	35.8219	32.5475	27.9633
average		0.130976	67.6926	50.6658	28.8365	32.1109	30.5828	29.0548	31.6743
sd		3.00103	7.89484	3.29615	5.45296	7.53348	6.93059	3.29615	4.82719
s. error		1.73265	4.55809	1.90303	3.14827	4.34946	4.00138	1.90303	2.78698
			hcd1	cvbr	cvo	cvwi	scd1	scd3	kw
		rate	67.6926	50.6658	28.8365	32.1109	30.5828	29.0548	31.6743
		sd	7.89484	3.29615	5.45296	7.53348	6.93059	3.29615	4.82719
