# Supplementary material for: Biodegradation of crystal violet by newly isolated bacteria
Source: PeerJ. 2024 May 27;12:e17442. doi: 10.7717/peerj.17442 (PMC11138513; doi:10.7717/peerj.17442)
Supplement: Supplemental Information 2 — Absorbance measurements and calculated degradation rates, each repeated three times. [file peerj-12-17442-s002.xlsx]

## Sheet: Sheet1
	crystal violet	before	after		1. hcvd1			2. cvbr						4. cvwi						7.kw
	O.D	1.08	1.08		0.97	0.78		0.76	1.05					0.99	0.99					0.76	0.84
		1.13	1.2		0.85	0.8		0.64	0.99					0.95	0.73					0.73	0.93
		1.12	1.13		0.71	0.68		0.62	0.82					0.91	0.85					0.68	0.81
	average	1.11	1.13667		0.843333	0.753333		0.673333	0.953333					0.95	0.856667					0.723333	0.86
				strain	1			2						4						7
				temperature	37	25		37	25					37	25					37	25
				O.D	13.3929	30.3571		32.1429	6.25					11.6071	11.6071					32.1429	25
					24.1071	28.5714		42.8571	11.6071					15.1786	34.8214					34.8214	16.9643
					36.6071	39.2857		44.6429	26.7857					18.75	24.1071					39.2857	27.6786
				average	24.7024	32.7381		39.881	14.881					15.1786	23.5119					35.4167	23.2143
				SD	9.48653	4.68691		5.52001	8.6974					2.91606	9.48653					2.94628	4.5527
				standard error	5.47705	2.70599		3.18698	5.02145					1.68359	5.47705					1.70103	2.6285
				strain	1					2			4			7
				temperature	25°C	37°C				25°C	37°C		25°C	37°C		25°C	37°C
				activity	32.7	24.7024				14.88	39.88		23.5	15.2		23.2	35.42
				standard error	2.71	5.48				5.02	3.19		5.48	1.68		2.63	1.7
				SD	4.68691	9.48653				8.6974	5.52001		9.48653	2.91606		4.5527	2.94628
				p value	0.363423					0.0343941			0.340195			0.0415921
