# Supplementary material for: Biodegradation of crystal violet by newly isolated bacteria
Source: PeerJ. 2024 May 27;12:e17442. doi: 10.7717/peerj.17442 (PMC11138513; doi:10.7717/peerj.17442)
Supplement: Supplemental Information 3 — It includes absorbance measurements and calculated degradation rates, each repeated three times [file peerj-12-17442-s003.xlsx]

## Sheet: Sheet1
					4	cvwi						2	cvbr									1	hcvd1						7	kw
	pH				average	STEDV	sd error					average	STEDV	sd error				pH				average	STEDV	sd error					average				control (only dye)
OD	5	0.52	0.64	0.455	1.65375				1.24	1.16667	1.25333	1.22					OD	5	0.79	0.92	0.69	0.8	0.115326			0.64	0.79	0.63	0.686667				1.35	initial
	6	1.18	0.99	1.2	2.3425				1.24	1.08	1.18	1.16667						6	0.91	0.97	0.81	0.896667	0.080829			0.78	0.85	0.67	0.766667				1.34	final
	7	0.97	0.99	1.16	2.53				0.82	0.92	0.99	0.91						7	0.72	0.81	0.54	0.69	0.137477			0.66	0.68	0.82	0.72
	8	0.95	0.83	0.72	2.625				0.75	1.02	0.88	0.883333						8	0.42	0.57	0.68	0.556667	0.130512			0.84	0.62	0.75	0.736667
					activity	STEDV	sd error	pH				activity	STEDV	sd error				pH				activity	STEDV	sd error					activity	STEDV	sd error
activity	5	61.4815	52.5926	66.2963	60.1235	6.95205	4.01377	5	8.14815	13.5802	7.16049	9.62963	3.45679	1.99578				5	41.4815	31.8519	48.8889	40.7407	8.54264	4.93209		52.5926	41.4815	53.3333	49.1358	6.63918
	6	12.5926	26.6667	11.1111	16.7901	8.58535	4.95676	6	8.14815	20	12.5926	13.5802	5.98734	3.45679				6	32.5926	28.1481	40	33.5802	5.98734	3.45679		42.2222	37.037	50.3704	43.2099	6.72131
	7	28.1481	26.6667	14.0741	22.963	7.73356	4.46497	7	39.2593	31.8519	26.6667	32.5926	6.32889	3.65399				7	46.6667	40	60	48.8889	10.1835	5.87945		51.1111	49.6296	39.2593	46.6667	6.45763
	8	29.6296	38.5185	46.6667	38.2716	8.5212	4.91972	8	44.4444	24.4444	34.8148	34.5679	10.0023	5.77482				8	68.8889	57.7778	49.6296	58.7654	9.66754	5.58156		37.7778	54.0741	44.4444	45.4321	8.19292
					cvwi							cvbr										hcvd1						kw
					F value	P-value						F value	P-value									F value	P-value					F value	P-value
					17.5671	0.00070217						10.488	0.00380321									4.60391	0.037403					0.370268	0.776764
		4
	5	60.1235	4.01377
	6	16.7901	4.95676
	7	22.963	4.46497
	8	38.2716	4.91972

## Sheet: Sheet3
분산 분석: 일원 배치법
요약표
인자의 수준	관측수	합	평균	분산
Row 1	3	180.37	60.1235	48.331
Row 2	3	50.3704	16.7901	73.7083
Row 3	3	68.8889	22.963	59.808
Row 4	3	114.815	38.2716	72.6109
분산 분석
변동의 요인	제곱합	자유도	제곱 평균	F 비	P-값	F 기각치
처리	3352.57	3	1117.52	17.5671	0.00070217	4.06618
잔차	508.916	8	63.6145
계	3861.49	11
